# Supplementary material for: Design of the DIRECT-project: interventions to increase job resources and recovery opportunities to improve job-related health, well-being, and performance outcomes in nursing homes
Source: Springer Nature journal article supplement (doi:10.1186/1471-2458-10-293), 2010-05-28
Supplement: 12889_2010_2204_MOESM1_ESM.pdf [file 12889_2010_2204_MOESM1_ESM.pdf]

Selecting 8 nursing  
home wards  
N = 300 nursing staff

Intervention Group  
4 wards  
N=150

Comparison Group  
4 wards  
N=150

Baseline  
Survey  
(T1)

Baseline  
Survey  
(T1)

Interventions

Follow-up  
Survey  
(T2), 12 months

Follow-up  
Survey  
(T2), 12 months

Follow-up  
Survey  
(T3), 24 months

Follow-up  
Survey  
(T3), 24 months
