# Supplementary figures and images for: Design of the DIRECT-project: interventions to increase job resources and recovery opportunities to improve job-related health, well-being, and performance outcomes in nursing homes
Source: Springer Nature journal article supplement (doi:10.1186/1471-2458-10-293), 2010-05-28

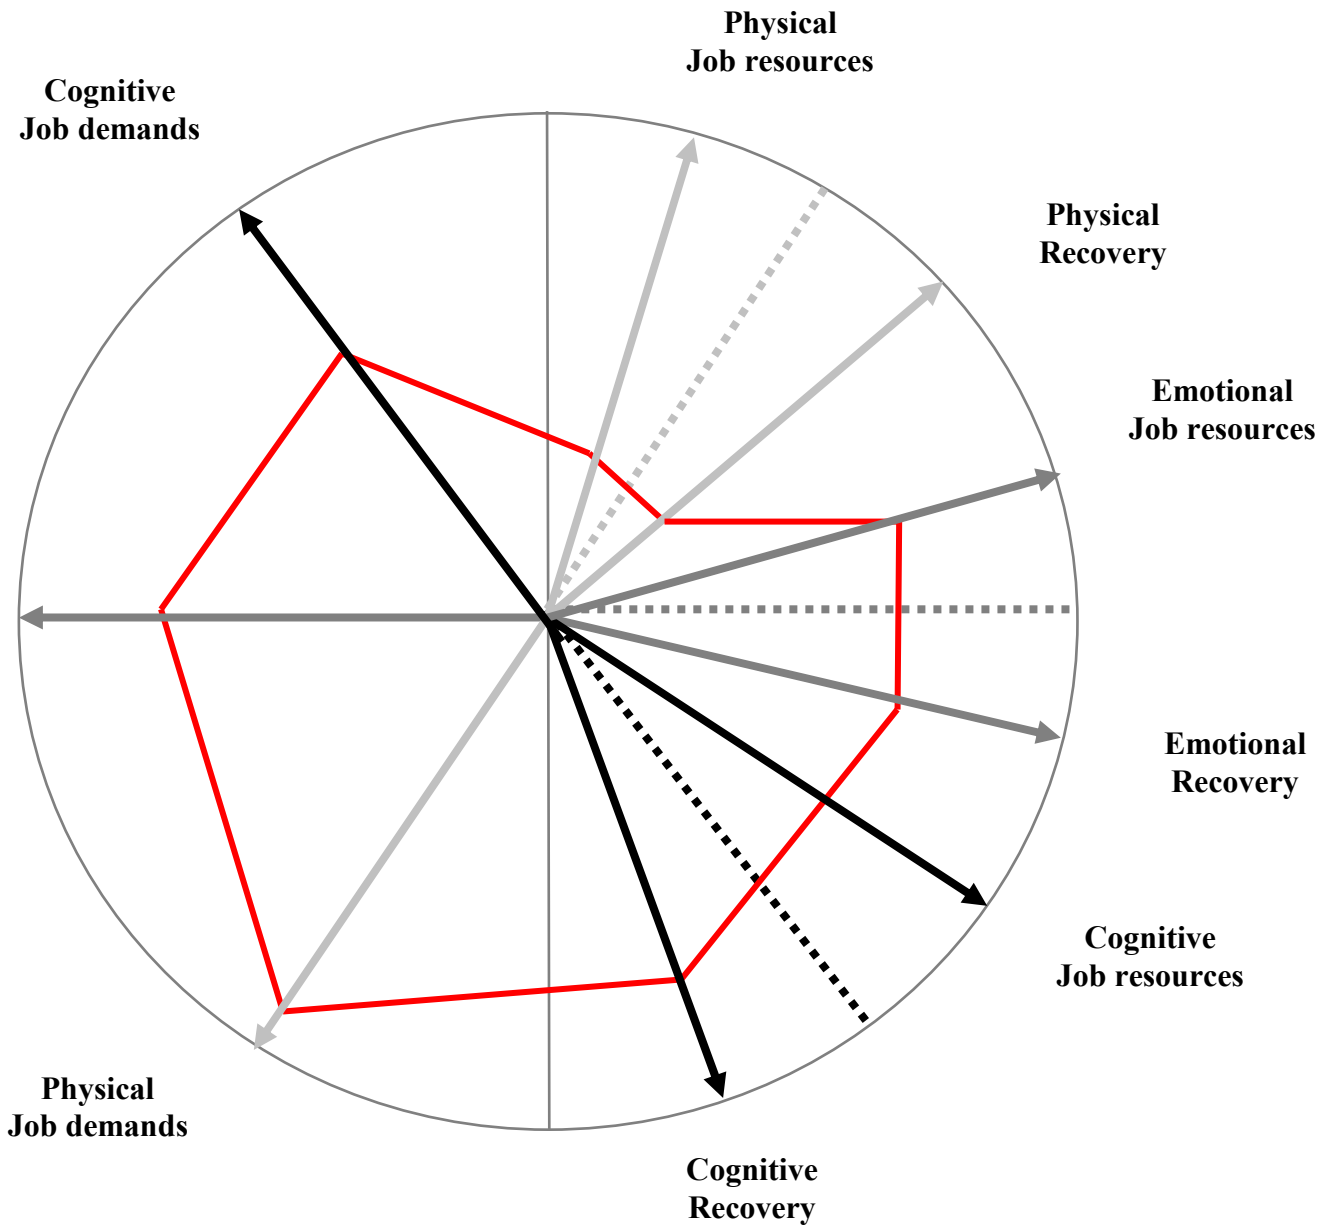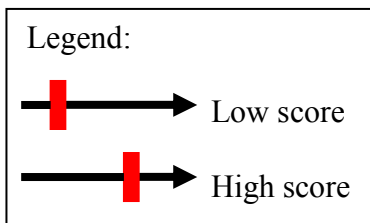

Supplement: 12889_2010_2204_MOESM2_ESM.pdf [file 12889_2010_2204_MOESM2_ESM.pdf]

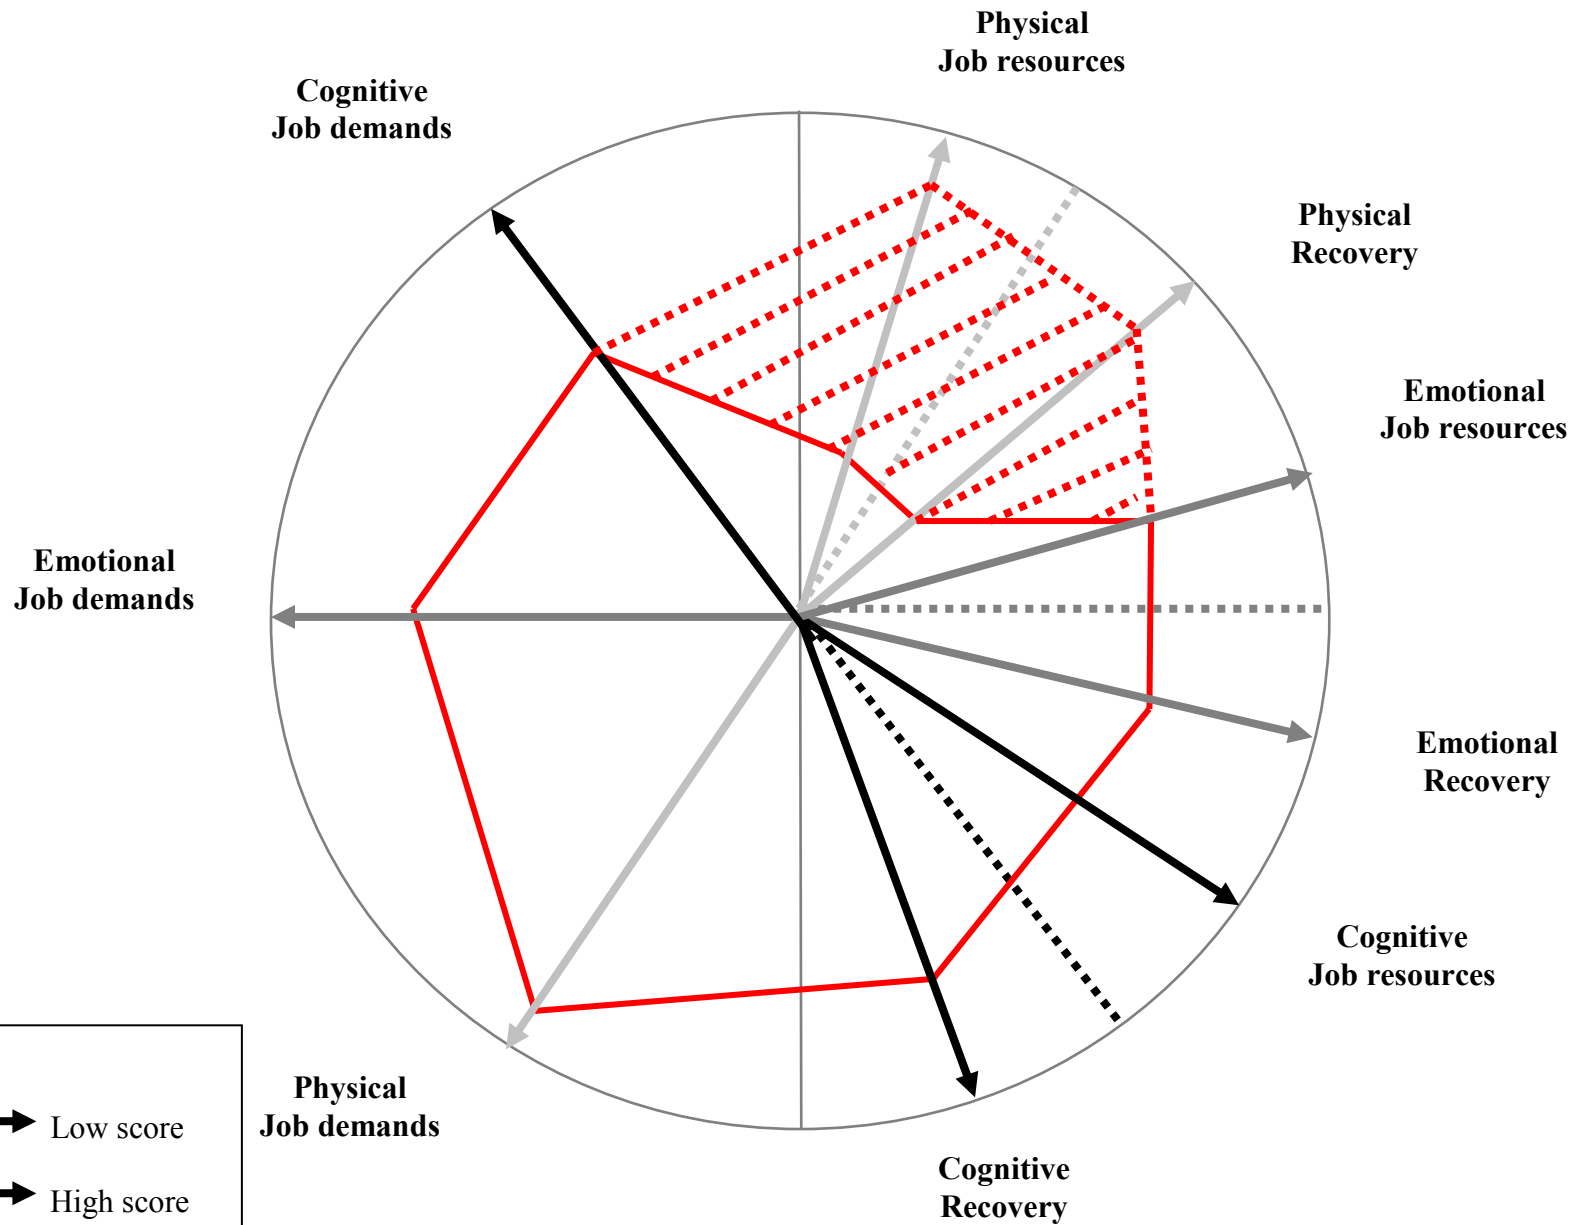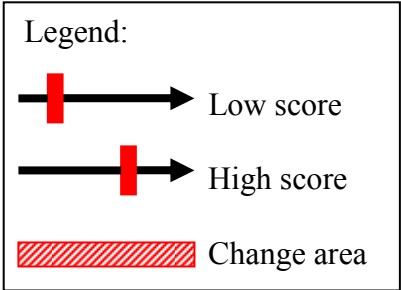

Supplement: 12889_2010_2204_MOESM4_ESM.pdf [file 12889_2010_2204_MOESM4_ESM.pdf]
